# Supplementary material
Source: publisher site journal article supplement (https://www.dovepress.com/article/352948)
Supplement: Supplementary file 1 [file get_supplementary_file.php]

**Supplementary Table 1** Primary antibodies used in this study

| **antibody** | **source** | **producer** | **Cat No.** | **Dilution ratio** |
| --- | --- | --- | --- | --- |
| β-Catenin | Rabbit | Affinity | AF6266 | 1:1000 |
| N-Cadherin | Rabbit | Proteintech | 22018-1-AP | 1:2000 |
| E-Cadherin | Rabbit | Proteintech | 20874-1-AP | 1:1000 |
| P70 | Rabbit | Proteintech | 14485-1-AP | 1:1000 |
| Bax | Rabbit | Proteintech | 50599-2-lg | 1:2000 |
| Cleaved-Caspase 3 | Rabbit | Affinity | AF6311 | 1:1000 |
| Cyclin D1 | Mouse | Proteintech | 60186-1-lg | 1:5000 |
| Vimentin | Rabbit | Affinity | AF7013 | 1:1000 |
| GAPDH | Mouse | Proteintech | 60004-1-Ig | 1:5000 |
| β-actin | Mouse | Proteintech | 60008-1-Ig | 1:5000 |

**Supplementary Table 2** Secondary antibodies used in this study

| **antibody** | **producer** | **Cat No.** | **Dilution ratio** |
| --- | --- | --- | --- |
| Anti-Rabbit IgG | Affinity | S0001 | 1:5000 |
| Anti-Mouse IgG | Affinity | S0002 | 1:5000 |
